# Supplementary material
Source: PubMed Central journal article supplement (PMC3852347)
Supplement: Supp_Figure1.pdf [file Supp_Figure1.pdf]

## Supplementary Data

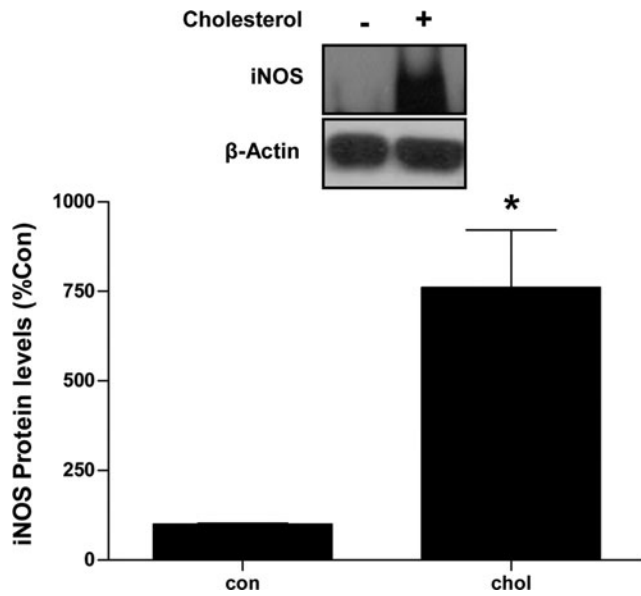

**SUPPLEMENTARY FIG. S1. Cholesterol load increases iNOS protein levels *in vitro*.** iNOS protein levels were elevated in primary rat hepatocytes incubated with 0.2 mg/ml of water-soluble cholesterol for 24 h. \* $p < 0.008$  ( $n = 3$ ). iNOS, inducible nitric oxide synthase.
