# Supplementary material
Source: PubMed Central journal article supplement (PMC3852347)
Supplement: Supp_Figure2.pdf [file Supp_Figure2.pdf]

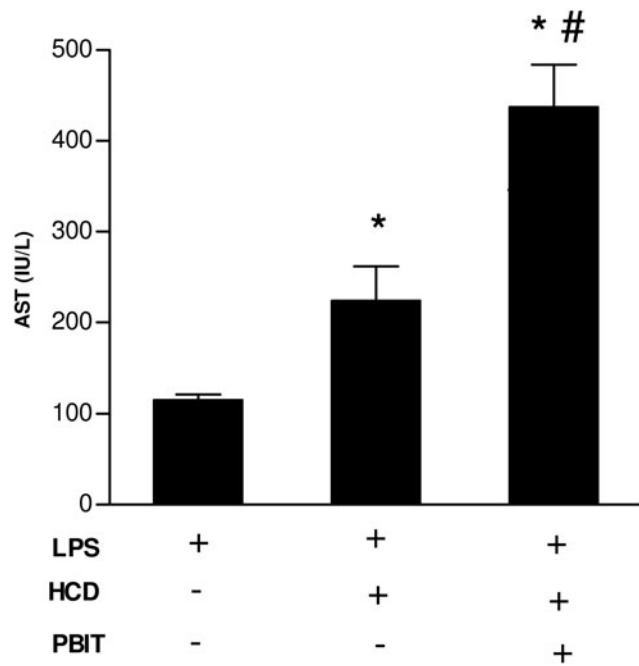

**SUPPLEMENTARY FIG. S2.** AST levels in WT mice treated with HCD with or without the iNOS specific inhibitor, PBIT (100 ppm in the diet). After diet period, mice were injected with LPS. AST levels were measured 6 h after LPS administration. Values are expressed as mean±SEM ( $n=3-4$  for each group). \* $p < 0.05$ , versus LPS group. # $p < 0.02$  versus LPS+HCD group. AST, aspartate aminotransferase; HCD, high-cholesterol diet; WT, wild-type; LPS, lipopolysaccharide.
