# Supplementary material
Source: PubMed Central journal article supplement (PMC3852347)
Supplement: Supp_Figure4.pdf [file Supp_Figure4.pdf]

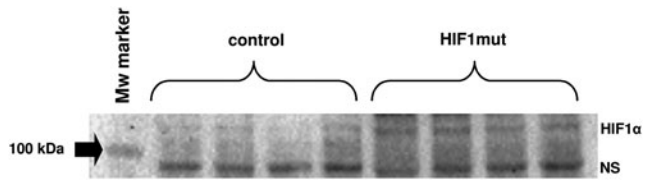

**SUPPLEMENTARY FIG. S4. HIF1 $\alpha$  protein levels in mice treated with hydrodynamic injection of HIF1mut containing plasmid or empty vector.** HIF1 $\alpha$  expression in total liver lysate was evaluated using western blot analysis. HIF1, hypoxia-inducible factor-1.
